# Supplementary material
Source: PubMed Central journal article supplement (PMC8522531)
Supplement: NIHMS1687221-supplement-Supplementary_Table_1.pdf [file NIHMS1687221-supplement-Supplementary_Table_1.pdf]

| ReadName                  | Read (with APP)       | Mate (novel site)    | Read orientation |
|---------------------------|-----------------------|----------------------|------------------|
| SRR8898224.96962287       | CGTGCTGGTGCATCTTGGAG  | GCCTCATGTTGCTCATTGGT | R1R2             |
| SRR8898224.107824814      | CTTCCCCGTCATCATCGGCT  | GAGTGGGATGCCACATGTC  | R1R2             |
| SRR8898224.20867379       | CTCCACCTCAGCCTCTTCTI  | TAAAATTGAAGTACAGGCTA | F1R2             |
| SRR8898224.118878929      | CCTTGATCACTAATCATGT   | TGAGAGGAAAAGGCCCTT   | F1R2             |
| SRR8898276.166141196      | CGCTCCTCTGGGGTGACAG   | CAACATCCAATCATGTATAA | F1R2             |
| SRR8898224.107643979_mate | GCGAGTGGGATCCGCCGCC   | GAAGGCCCTGGAAACCGAC  | F2R1             |
| SRR8898224.27622836_mate  | CCGTCCCCTGTCACTGGG    | GGGGTGAAGGAGGTGCCA   | F2R1             |
| SRR8898224.49640101_mate  | TTACCAATTCTGCCTCCTGTI | CCTGGGACTGCTCCTTTACT | F2R1             |
| SRR8898224.96736610_mate  | ACAATGTCTTTTAAATTAATA | CCTCTTCCTTCACACCACC  | F1R2             |
| SRR8898268.233861544_mate | CAGCAACCAAGGCTCATACT  | GCTCTGGAAACAGGAAGAA  | F2R1             |

| Read location<br>on APP | Mate location            | Sample ID   | Region type | Intersected Gene |
|-------------------------|--------------------------|-------------|-------------|------------------|
| 18/17                   | chr3:72631698-72631798   | AD304 HIF   | intergenic  | intergenic       |
| 6/5                     | chr13:37663681-37663781  | AD304 HIF   | Intron      | TRPC4            |
| 6/5                     | chr5:140870048-140870148 | AD304 HIF   | Intron      | PCDHA1           |
| 14/13                   | chr1:155946754-155946854 | AD304 HIF   | 3'UTR       | ARHGEF2          |
| 18/17                   | chr6:72497946-72498046   | AD315 blood | intergenic  | intergenic       |
| 5'UTR                   | chr1:148953252-148953352 | AD304 HIF   | Intron      | PDE4DIP          |
| 3'UTR                   | chr12:7210081-7210181    | AD304 HIF   | 5'UTR       | PEX5             |
| 3'UTR                   | chr3:172916391-172916491 | AD304 HIF   | Exon        | SPATA16          |
| 3'UTR                   | chr9:112879022-112879122 | AD304 HIF   | 3'UTR       | SLC46A2          |
| 3'UTR                   | chr10:43845520-43845620  | AD317 HIF   | Intron      | LINC00619        |
